# Supplementary material for: Bta-miR-223 Targeting the RHOB Gene in Dairy Cows Attenuates LPS-Induced Inflammatory Responses in Mammary Epithelial Cells
Source: MDPI journal article supplement (doi:10.3390/cells11193144), 2022-10-06
Supplement: s1 [file s1]

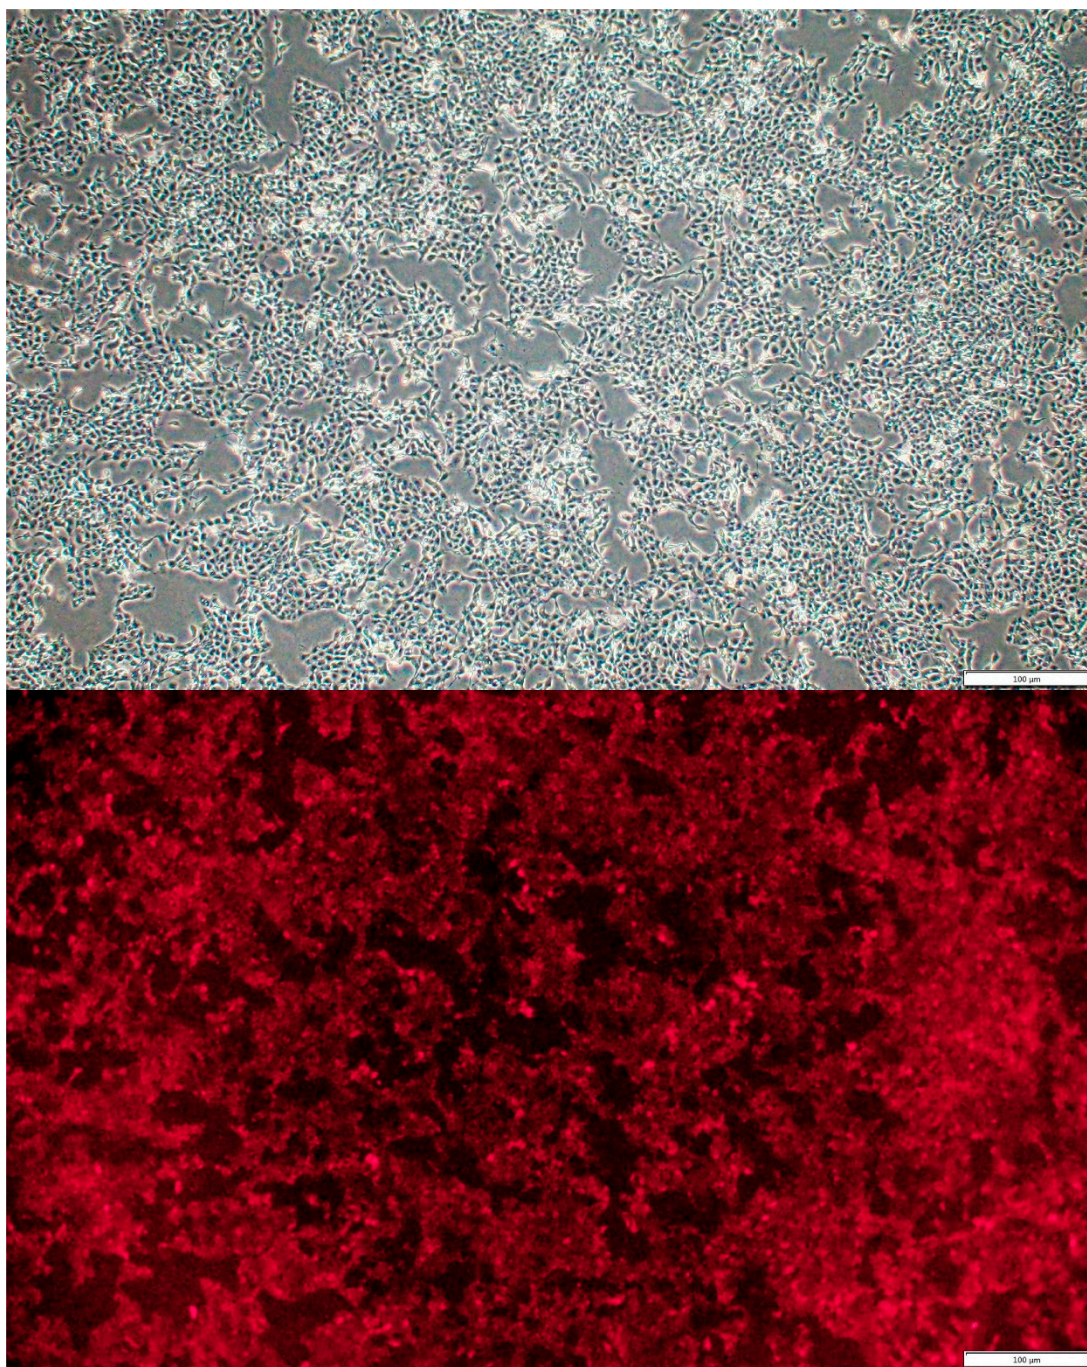

Figure S1 A. Cy3 labeled NC fluorescence transfection efficiency

Note: Magnification 40



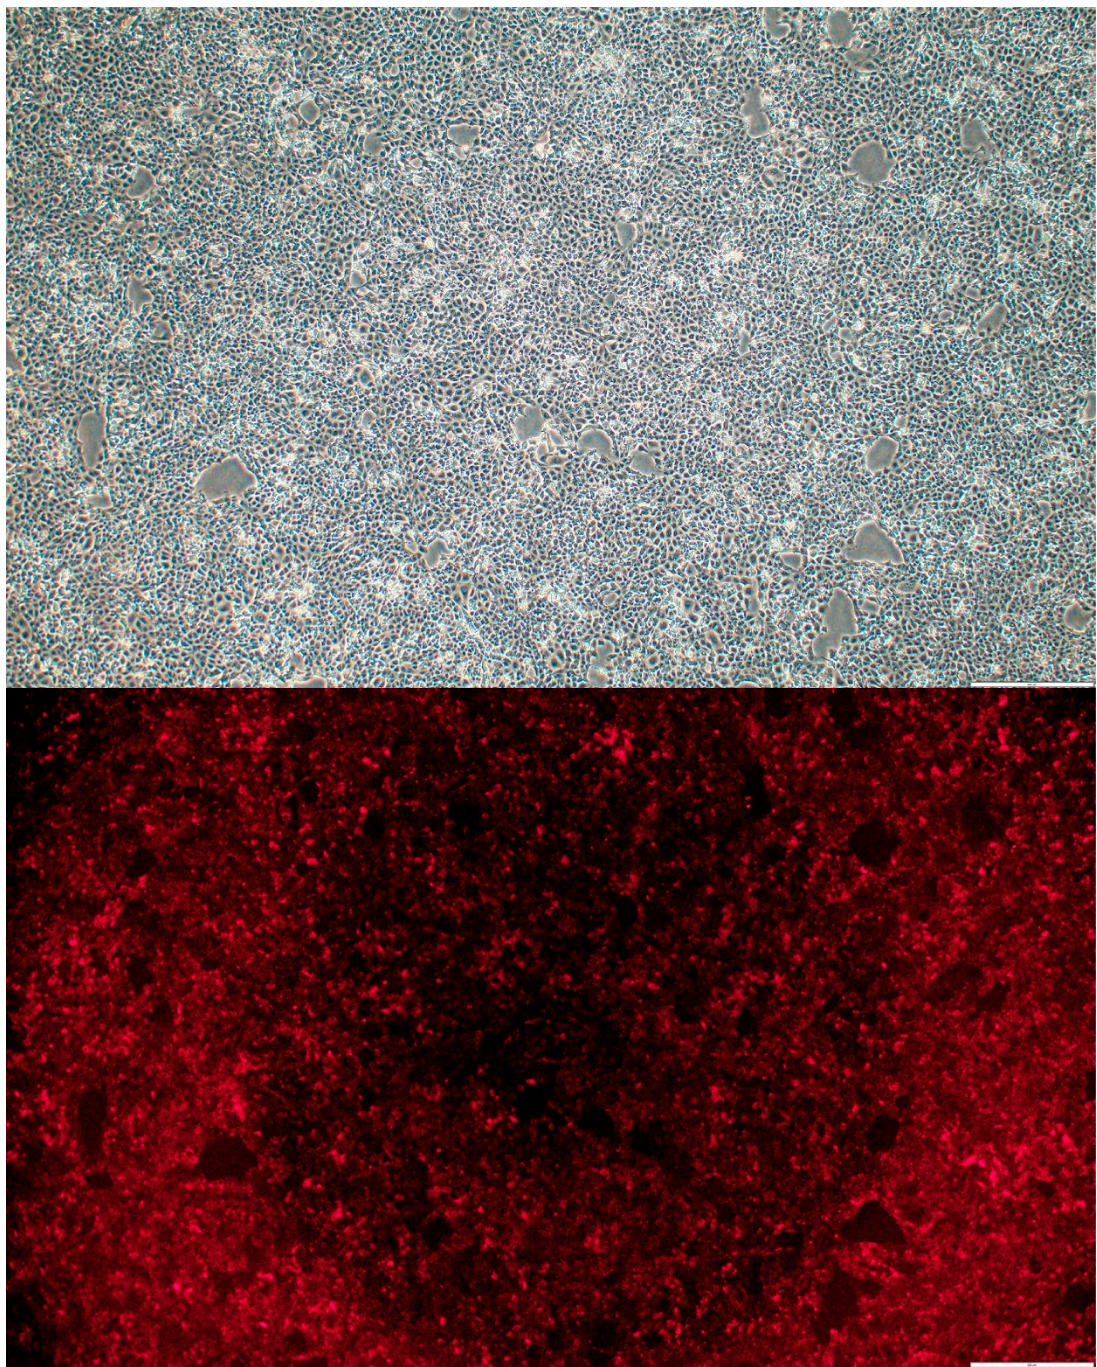

Figure S1 B. Cy3 labeled NC fluorescence transfection efficiency  
Note: Magnification 40
