# Supplementary material for: Bta-miR-223 Targeting the RHOB Gene in Dairy Cows Attenuates LPS-Induced Inflammatory Responses in Mammary Epithelial Cells
Source: MDPI journal article supplement (doi:10.3390/cells11193144), 2022-10-06
Supplement: s1 [file s1]

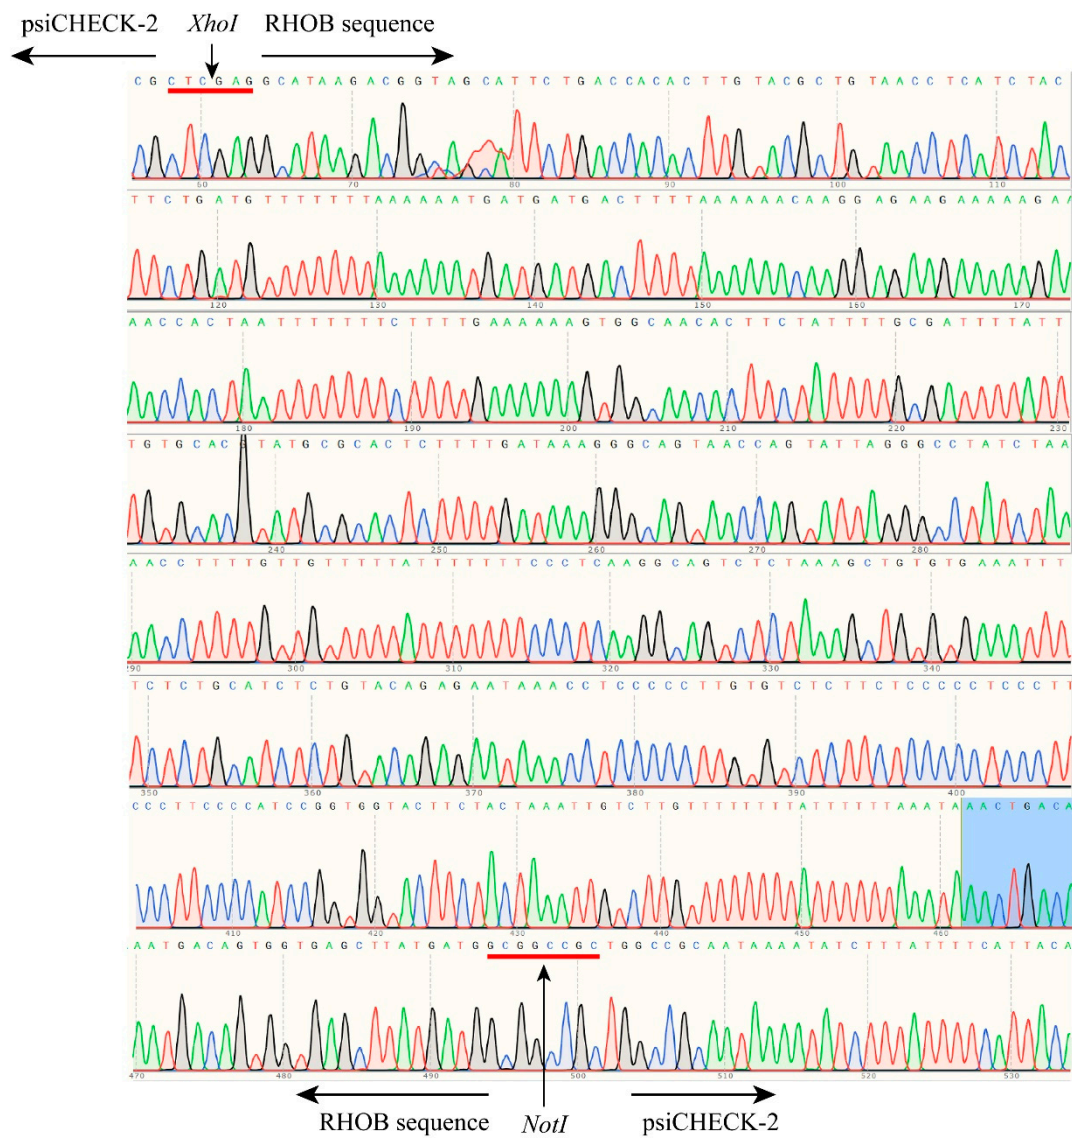

Figure S3 A. Sequencing results of RHOB-wt  
(The blue background is the binding site with bta-miR-223)

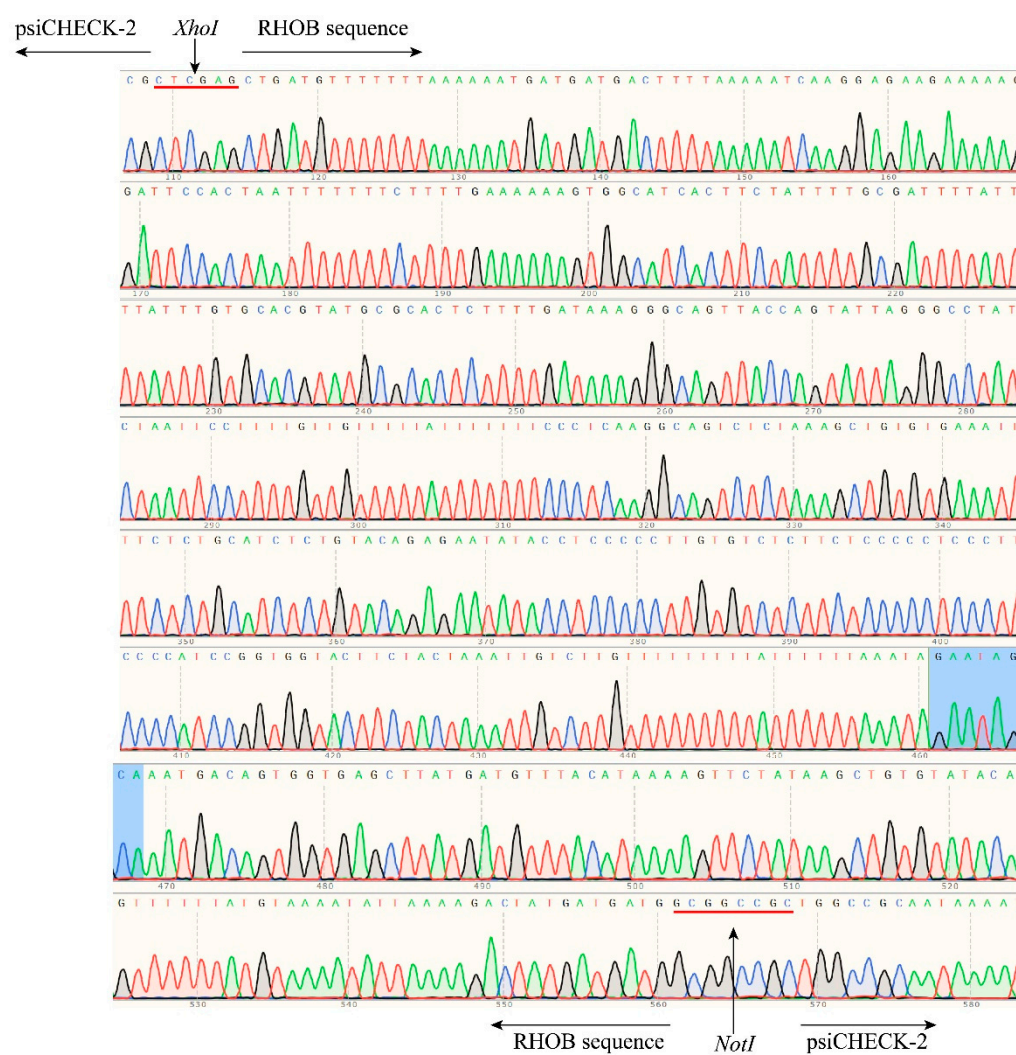

Figure S3 B. Sequencing results of RHOB-mut  
(The blue background is mutation site)
