# Supplementary material for: Bta-miR-223 Targeting the RHOB Gene in Dairy Cows Attenuates LPS-Induced Inflammatory Responses in Mammary Epithelial Cells
Source: Cells. 2022 Oct 6;11(19):3144. doi: 10.3390/cells11193144 (PMC9563457; doi:10.3390/cells11193144)
Supplement: Supplementary file 1 [file cells-11-03144-s001.zip]

Archive with 6 entries (5 files):
- Supplementary Materials/
- Supplementary Materials/Figure S1 A-B Transfection efficiency detection of miR-223 in bMECs - ╕▒▒╛.pdf
- Supplementary Materials/Figure S1 C Transfection efficiency detection of RHOB in bMECs.pdf
- Supplementary Materials/Figure S2 Gel electrophoresis result of RHOB amplification.pdf
- Supplementary Materials/Figure S3 Sequencing results of RHOB.pdf
- Supplementary Materials/Table S1 The list of all primer sequences.xlsx
