# Supplementary material for: Bta-miR-223 Targeting the RHOB Gene in Dairy Cows Attenuates LPS-Induced Inflammatory Responses in Mammary Epithelial Cells
Source: Cells. 2022 Oct 6;11(19):3144. doi: 10.3390/cells11193144 (PMC9563457; doi:10.3390/cells11193144)
Supplement: Supplementary file 1 [file cells-11-03144-s001.zip › Supplementary Materials/Table S1 The list of all primer sequences.xlsx]

## Sheet: Sheet1
Name	Primer pairs sequences (5′–3′)	Amplificationlength (bp)
siRNA-RHOB	F: GCACAGAGCUGGCCCGUAUTT R: AUACGGGCCAGCUCUGUGCTT
FAM NC / NC	F: GUAUGACAACAGCCUCAAGTT R：CUUGAGGCUGUUGUCAUACTT
RHOB-wt	F: CCGCTCGAGGCATAAGACGGTAGCATTC R: ATTTGCGGCCGCCATCATAAGCTCACCACTGT	431 431
Bta-miR-223	F: CGATGCGTGTCAGTTTGTCAA R: CAGTGCAGGGTCCGAGGTAT	65 65
RHOB	F: GTGCCCATCATCCTTGTG R：GGTTCCTGCTTCATACGG	86 86
NF-κB/p65	F: CCCCATCTTTGACAACCG R: TCCCGTGAAATACACCTCG	148 148
NF-κB/p50	F: ACGGGGAAGGTCTGAATG R: GTAGTCCCGTCATAAGTGG	220 220
IL-1β	F: CAACCGTACCTGAACCC R: GACACCACCTGCCTGAA	193 193
IL-6	F: CTGGGTTCAATCAGGCGAT R: CAGCAGGTCAGTGTTTGTGG	205 205
IL-8	F: ACACATTCCACACCTTTCCAC R: ACCTTCTGCACCCACTTTTC	149 149
GAPDH	F: GGCATCGTGGAGGGACTTATG R: GCCAGTGAGCTTCCCGTTGAG	186 186
RPS18	F: GTGGTGTTGAGGAAAGCAGACA R: TGATCACACGTTCCACCTCATC	79 79
