# Supplementary figures and images for: Bta-miR-223 Targeting the RHOB Gene in Dairy Cows Attenuates LPS-Induced Inflammatory Responses in Mammary Epithelial Cells
Source: MDPI journal article supplement (doi:10.3390/cells11193144), 2022-10-06

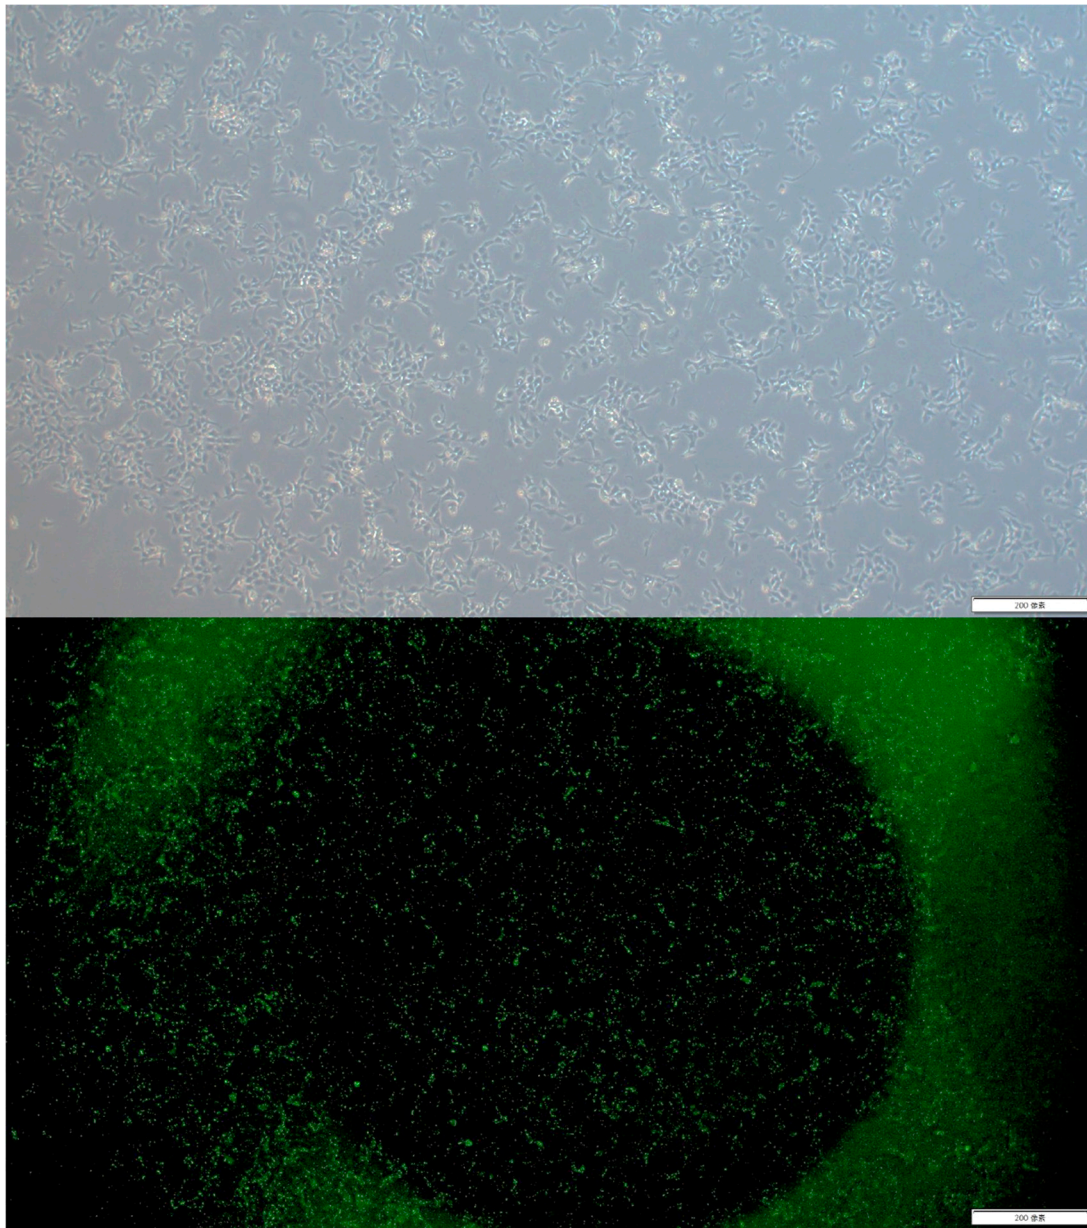

Figure S1 C. FAM labeled NC fluorescence transfection efficiency

Note: Magnification 40

Supplement: s1 [file s1]

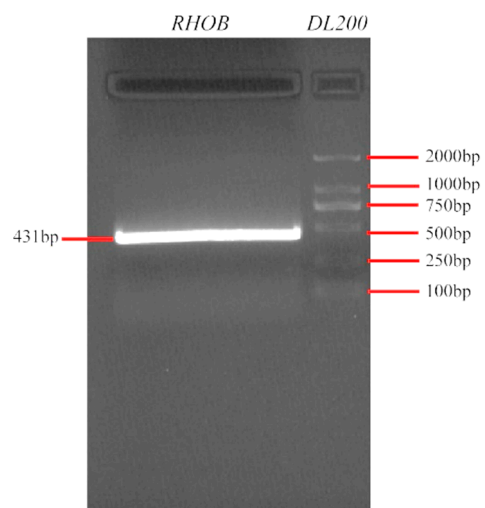

Figure S2: Gel electrophoresis result of

Supplement: s1 [file s1]
